# Supplementary material for: Role of different tautomers in the base-pairing abilities of some of the vital antiviral drugs used against COVID-19
Source: Royal Society of Chemistry journal article supplement (doi:10.1039/d0cp05297c), 2020-01-01
Supplement: d0cp05297c1.pdf [file d0cp05297c1.pdf]

## **Supporting Information**

### **Tautomeric and Base Pairing Effects of Some of the Vital Antiviral Drugs used Against COVID-19**

N.R. Jena\*

Discipline of Natural Sciences, Indian Institute of Information Technology, Design, and  
Manufacturing, Dumna Airport Road, Khamaria, Jabalpur-482005

---

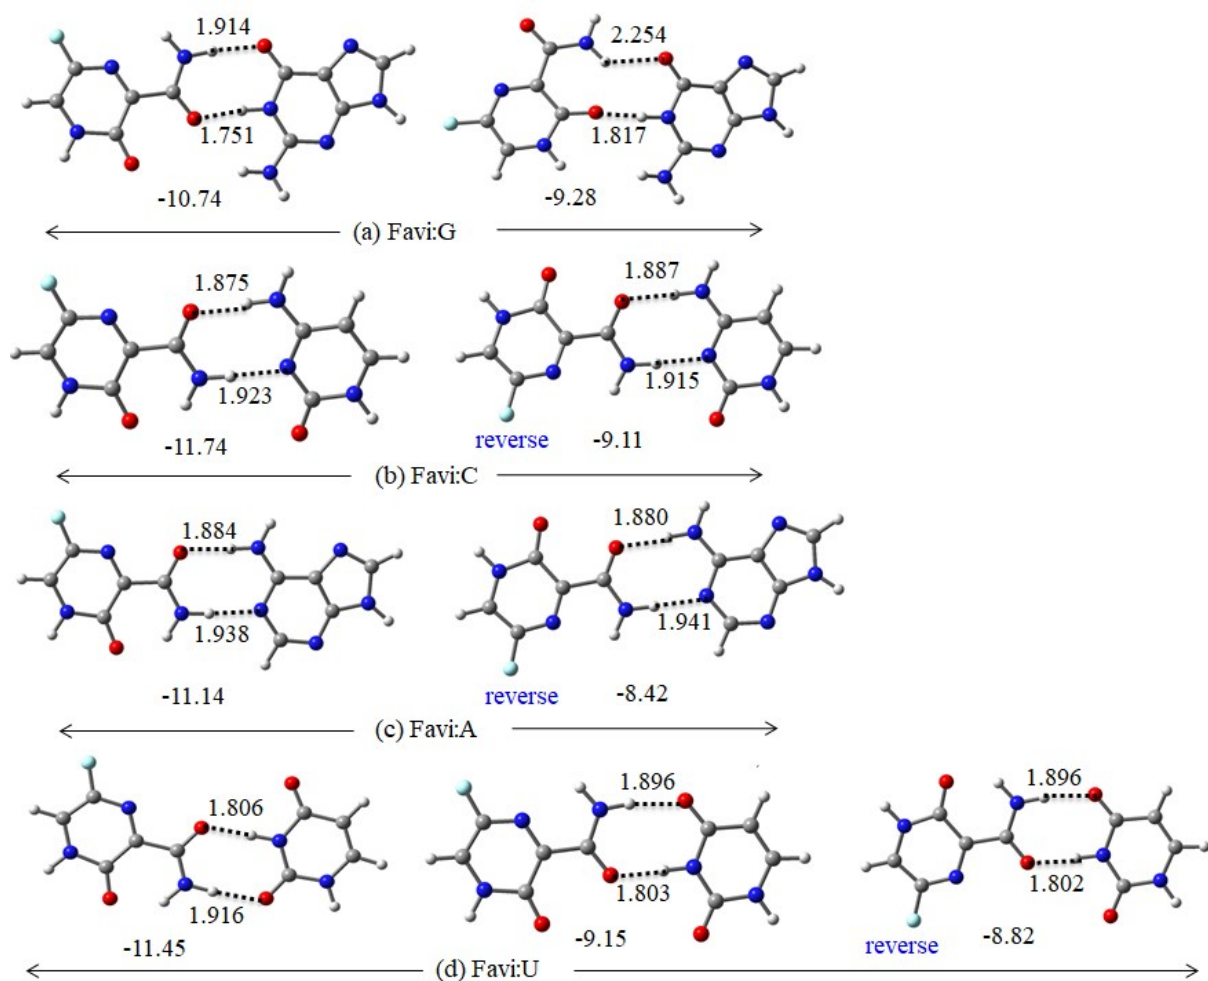

Fig. S1: Structures of different base pairs involving the keto tautomer of Favipiravir (k-Favi) obtained in the aqueous medium. The binding energies (kcal/mol) and hydrogen bond distances obtained at the B3LYP-D3/6-311++G\*\* level of theory in the aqueous medium are also shown.

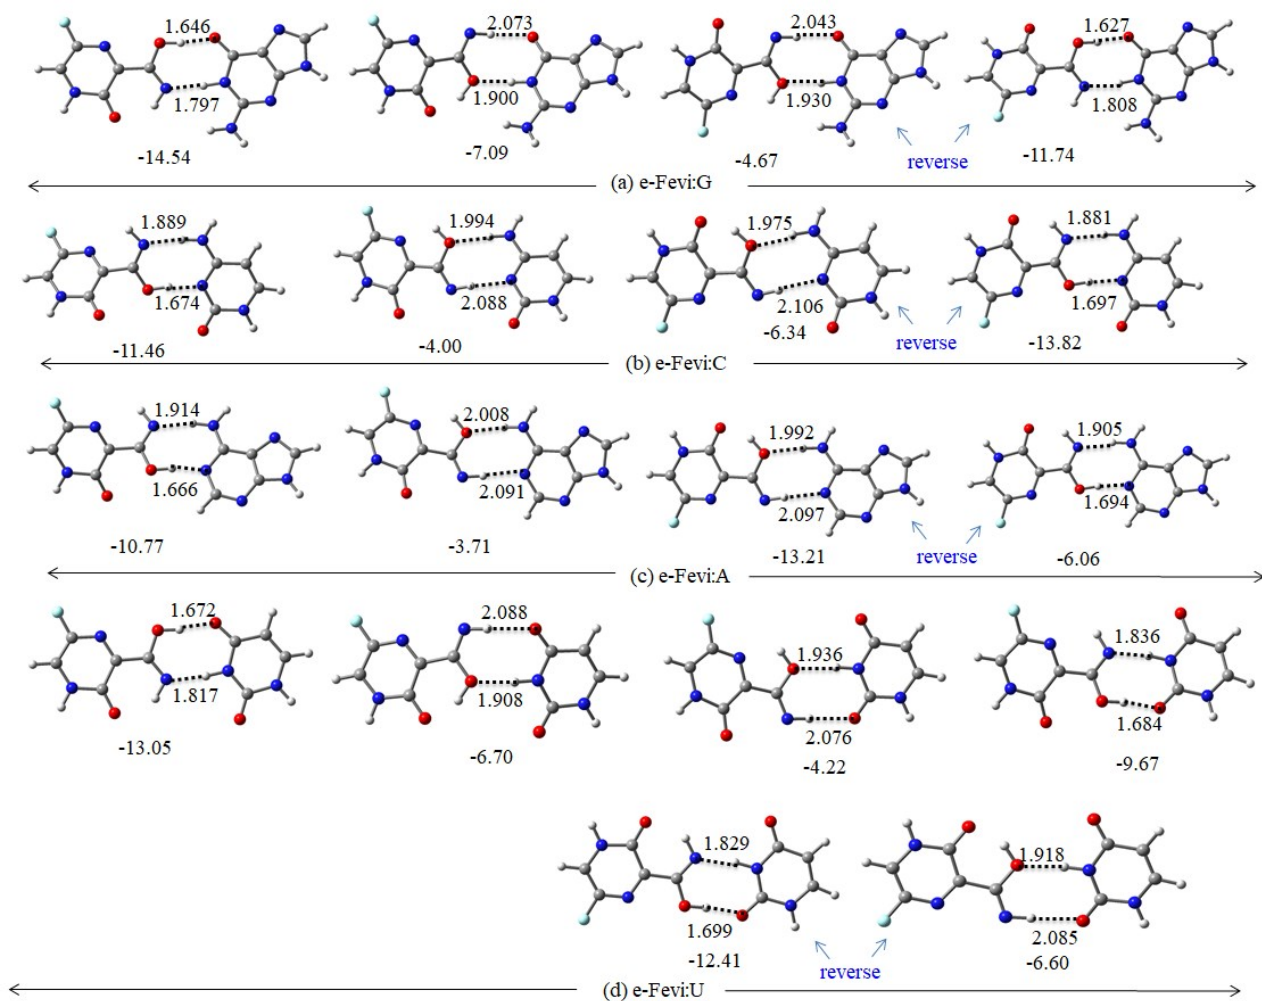

Fig. S2: Structures of different base pairs involving the enol tautomer of Favipiravir (e-Favi). The binding energies (kcal/mol) obtained at the B3LYP-D3/6-311++G\*\* level of theory in aqueous medium and hydrogen bond distances are also shown.

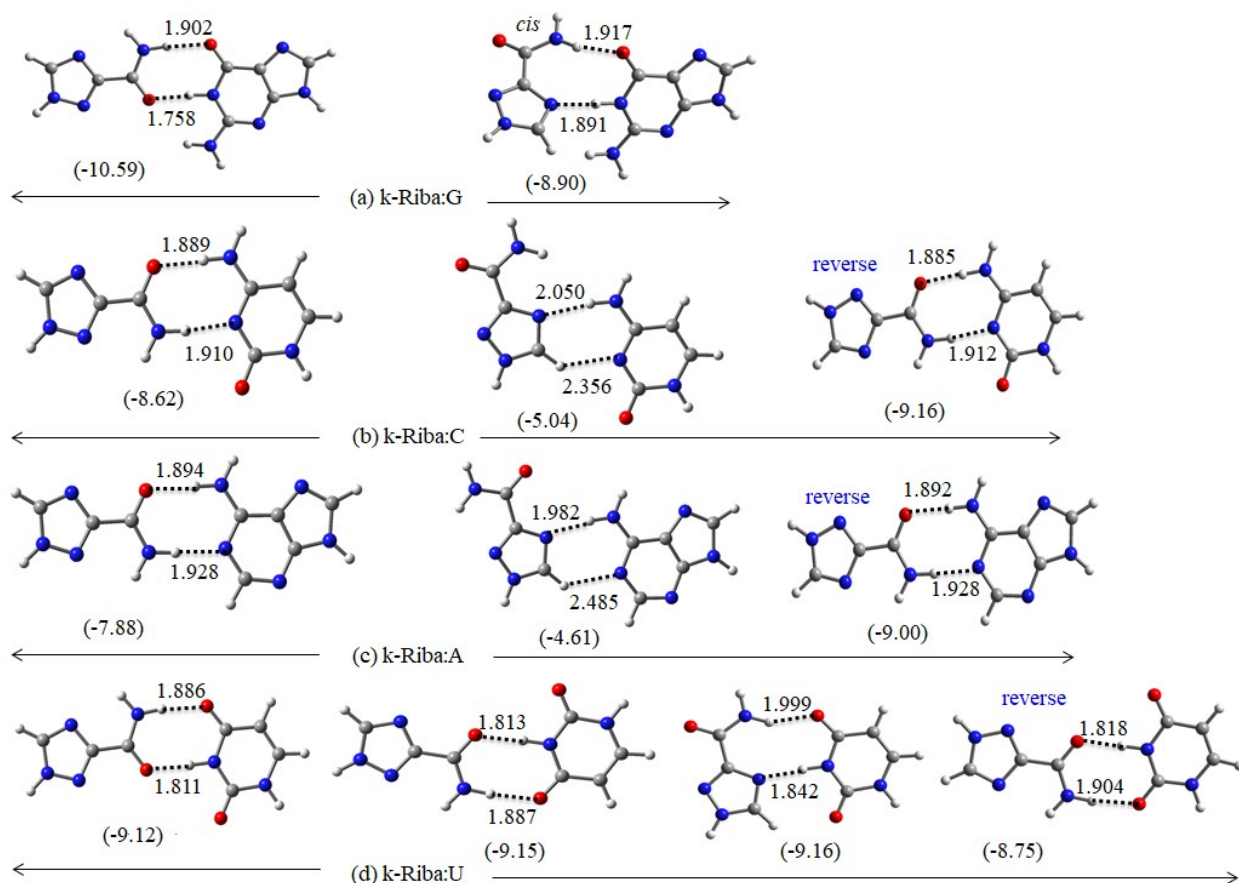

Fig. S3: Structures of different base pairs involving the keto tautomer of Ribavirin (k-Riba). The binding energies (kcal/mol) obtained at the B3LYP-D3/6-311++G\*\* level of theory in aqueous medium and hydrogen bond distances are also shown.

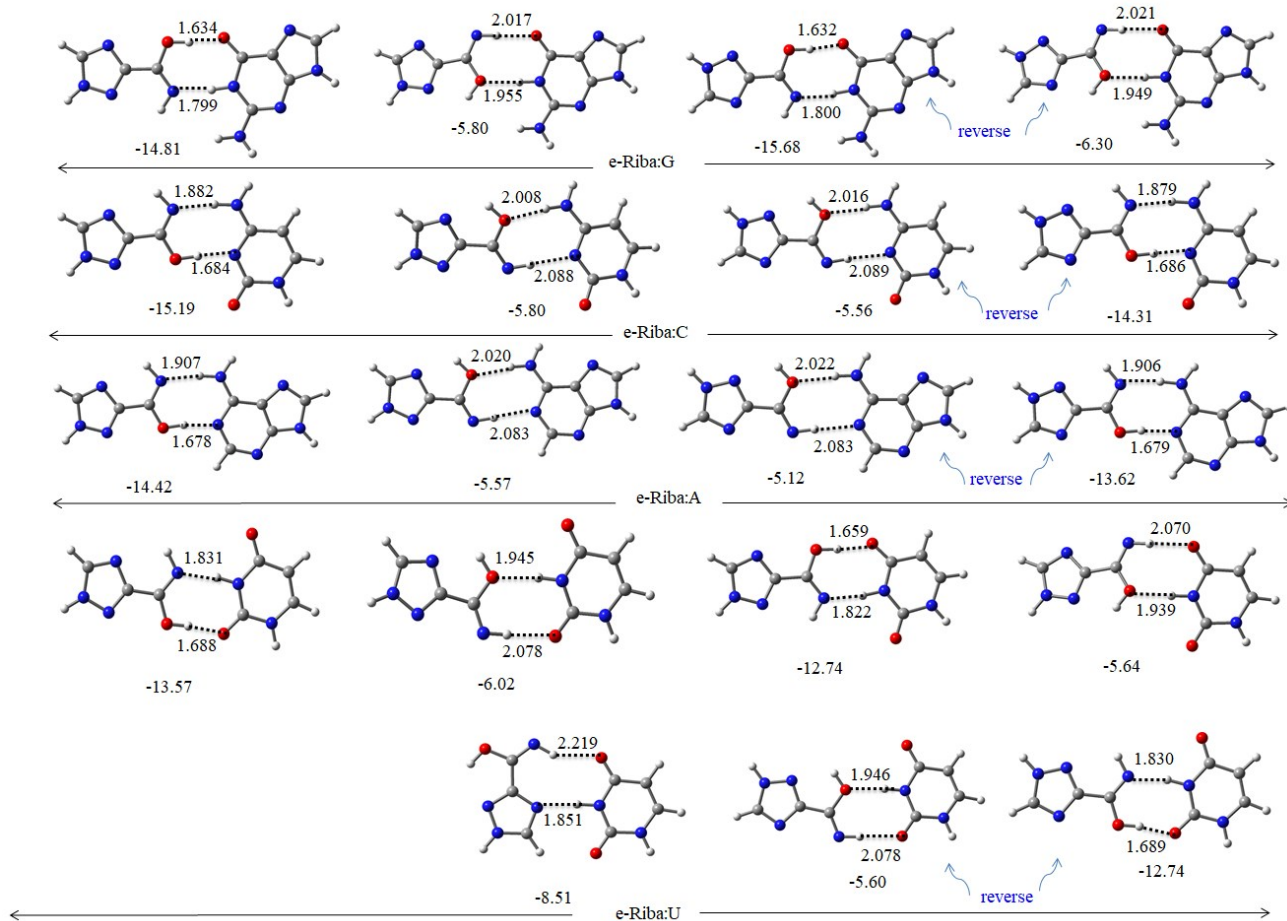

Fig. S4: Structures of base pairs involving the enol tautomer of Ribavirin (e-Riba). The binding energies (kcal/mol) obtained at the B3LYP-D3/6-311++G\*\* level of theory in aqueous medium and hydrogen bond distances are also shown.
